# Supplementary material
Source: Springer Nature journal article supplement (https://www.springermedizin.de/resource/supplementary/12889_2012_4521_MOESM2_ESM.pdf/9491478)
Supplement: MOESM2 [file 9491478]

## RECRUITMENT

18 to 60-year-old Hindustani Surinamese in The Hague

### Screening

- Informed consent
- Fasting blood sample
- Anthropometry and questionnaire

### High-risk group

- IFG and/or IGT (ADA)<sup>a</sup>
- Hb<sub>A1c</sub> ≥ 6.0%
- HOMA-IR<sup>b</sup>

Type 2 diabetes

Normoglycemia

Invitation to RCT

Referral to family physician

R  
A  
N  
D  
O  
M  
I  
Z  
A  
T  
I  
O  
N

## RANDOMIZED CONTROLLED TRIAL

### Process evaluation

- Questionnaire after 6 months
- Interviews
- Dieticians' dossiers and diet reports
- Audiotapes of sessions with dietician

Intervention group

T<sub>0</sub>

M

Intervention

T<sub>1</sub>

M

Booster sessions

T<sub>2</sub>

M

Control group

M

Control intervention

M

M

### Measurements at T<sub>0</sub>, T<sub>1</sub>, and T<sub>2</sub>

- Blood test
- Anthropometry and cardiorespiratory test
- Questionnaire (interview)

## RECRUITMENT

18 to 60-year-old Hindustani Surinamese in The Hague

### Screening

- Informed consent
- Fasting blood sample
- Anthropometry and questionnaire

### High-risk group

- IFG and/or IGT (ADA)<sup>a</sup>
- Hb<sub>A1c</sub> ≥ 6.0%
- HOMA-IR<sup>b</sup>

Type 2 diabetes

Normoglycemia

Invitation to RCT

Referral to family physician

R  
A  
N  
D  
O  
M  
I  
Z  
E  
D  
T  
R  
I  
A  
L

## RANDOMIZED CONTROLLED TRIAL

### Process evaluation

- Questionnaire after 6 months
- Interviews
- Dieticians' dossiers and diet reports
- Audiotapes of sessions with dietician

Intervention group

T<sub>0</sub>

M

Intervention

T<sub>1</sub>

M

Booster sessions

T<sub>2</sub>

M

Control group

M

Control intervention

M

M

### Measurements at T<sub>0</sub>, T<sub>1</sub>, and T<sub>2</sub>

- Blood test
- Anthropometry and cardiorespiratory test
- Questionnaire (interview)
